# Supplementary material
Source: PubMed Central journal article supplement (PMC6842600)
Supplement: pnas.1912060116.sapp.pdf [file pnas.1912060116.sapp.pdf]

# PNAS

[www.pnas.org](http://www.pnas.org)

Supplementary Information for

## **Invariable stoichiometry of ribosomal proteins in mouse brain tissues with aging**

Susan Amirbeigi<sup>1</sup>, Parnian Kiani<sup>2, #</sup>, Ana Velazquez Sanchez<sup>1, #</sup>, Christoph Krisp<sup>2</sup>, Andriy Kazantsev<sup>1</sup>, Lars Fester<sup>3</sup>, Hartmut Schlüter<sup>2</sup>, Zoya Ignatova<sup>1, \*</sup>

Corresponding author: Zoya Ignatova  
Email: [zoya.ignatova@uni-hamburg.de](mailto:zoya.ignatova@uni-hamburg.de)

### **This PDF file includes:**

Figures S1 to S7  
Tables S1 to S5  
SI References

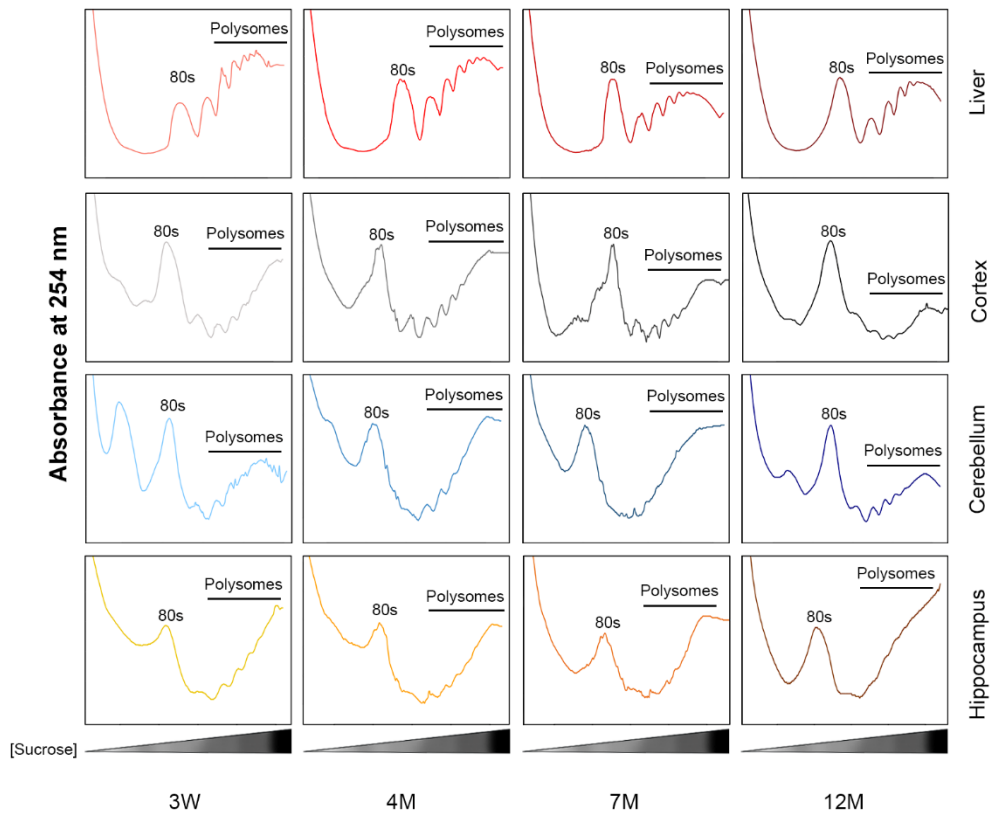

**Figure S1. Polysome profiles of brain and liver tissues.** 80S and polysomal fractions were separated on sucrose gradients. For clear separation between 80S and polysomes, the fraction of the disome peak was omitted. W, week; M, month.

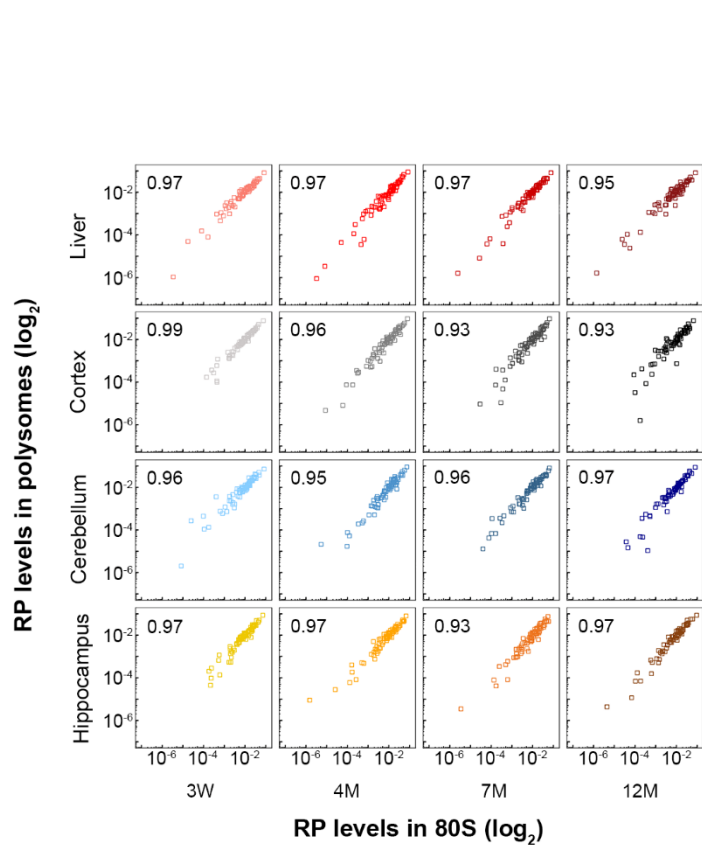

**Figure S2. Correlation between the RP levels in the 80S and polysomal fraction.** R<sup>2</sup>, Pearson correlation coefficient is given in each plot and also summarized in Table S3. W, week; M, month.

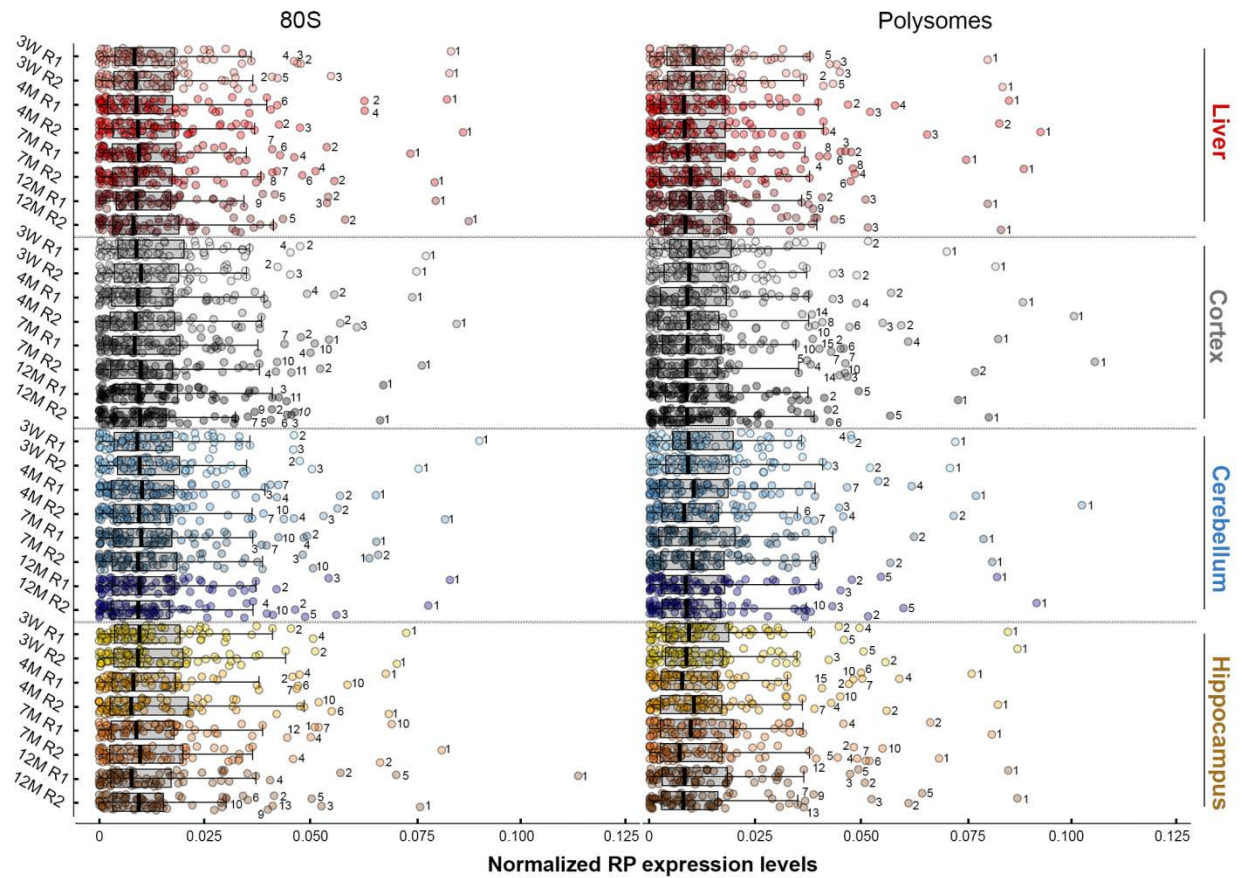

**Figure S3. Expression span of RPs in the replicates.** Boxplot of the expression levels of RPs in 80S and polysomes in each analyzed sample. Each dot is a single RP. R1, R2 denote each of the two biological replicate; W, week and M, month. Boxplots are median of expression  $\pm$  SD ( $n=2$ ). The outliers are RPs with the highest detected levels and are designated as follows: 1 – uS3; 2 – uS2; 3 – uL4; 4 – uS4; 5 – RACK1; 6 – eL13; 7 – uL30; 8 – eS10; 9 – uL18; 10 – uL15; 11 – eS4; 12 – eL18; 13 – eS8; 14 – uL10; 15 – eS25. Both biological replicates are highly similar ( $p$ -values, Wilcoxon rank sum test, or each replicate pair are summarized in Table S3).

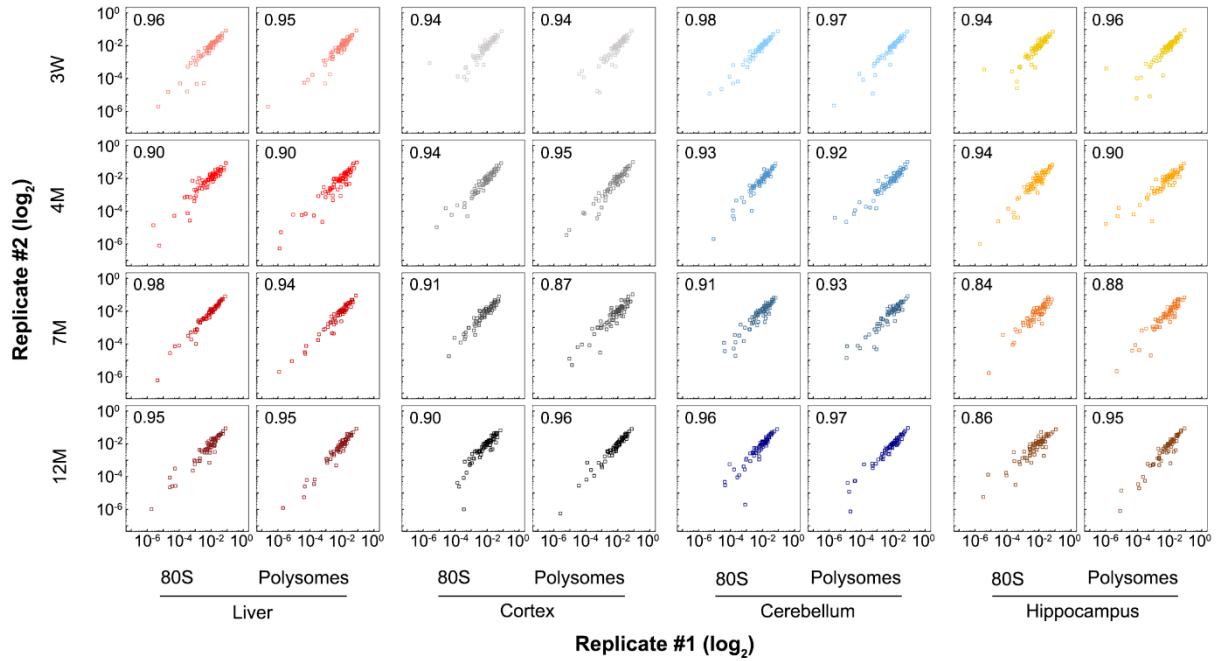

**Figure S4. Correlation between biological replicates.** The RPs in each biological replicate consisted of pooled homogenized tissues from three littermates. R<sup>2</sup>, Pearson correlation coefficient is given in each plot and also summarized in Table S3. W, week; M, month.

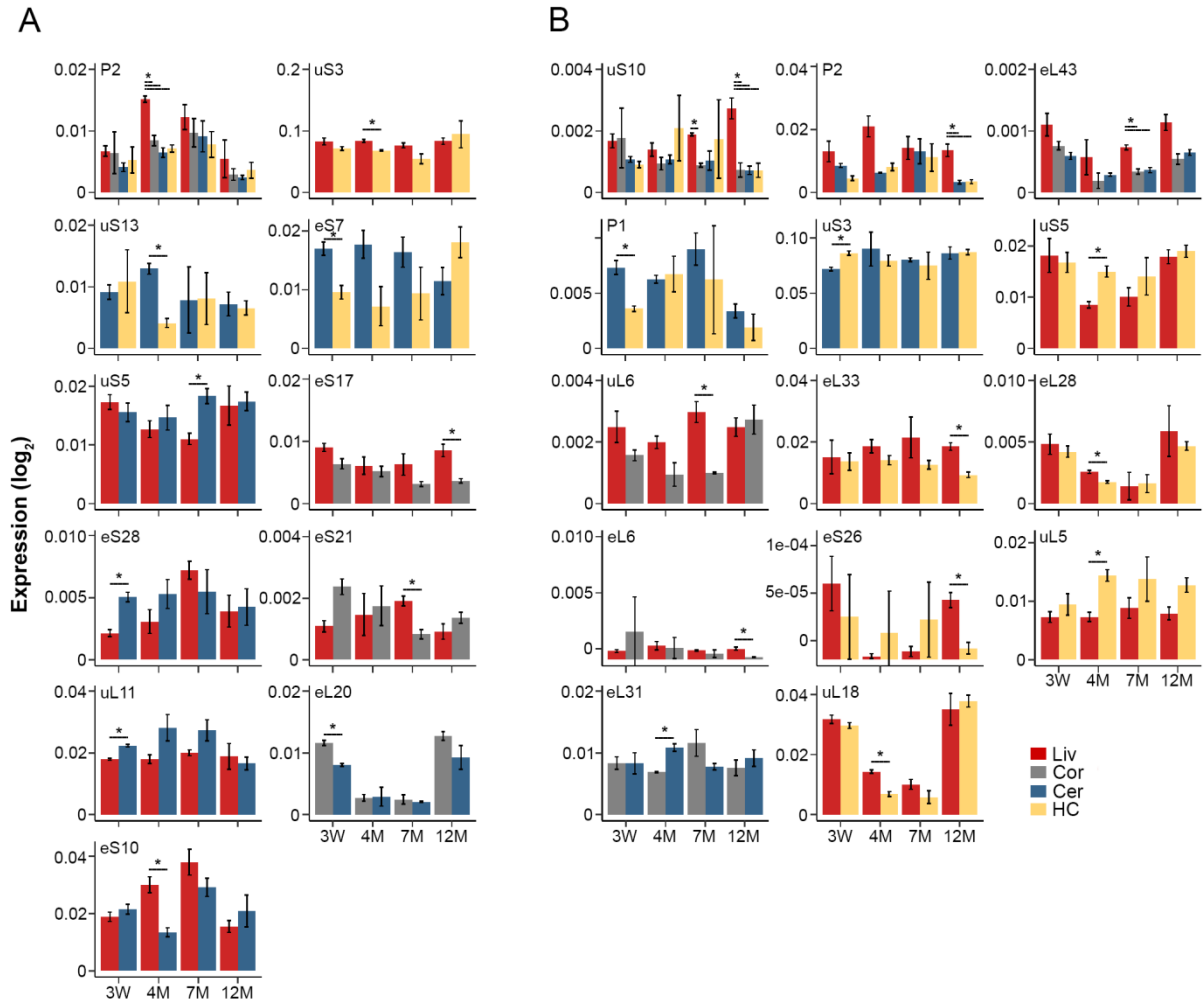

**Figure S5. The expression level of some RPs changes across tissues which changes however score insignificant. \***,  $P \leq 0.05$  in two tailed Student's  $t$ -test, which is insignificant by  $FDR < 0.1$  considering the fluctuations between two biological replicates. W, week; M, month.

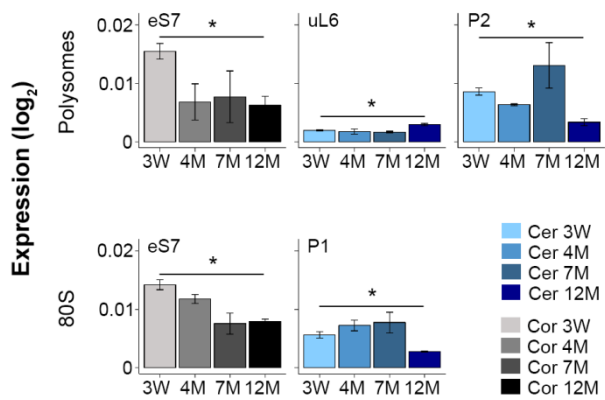

**Figure S6. The expression level of few RPs changes with age which scores insignificant. \*** ;  $P \leq 0.05$  in two tailed Student's  $t$ -test, which is insignificant by  $FDR < 0.1$  considering the fluctuations between two biological replicates. W, week; M, month.

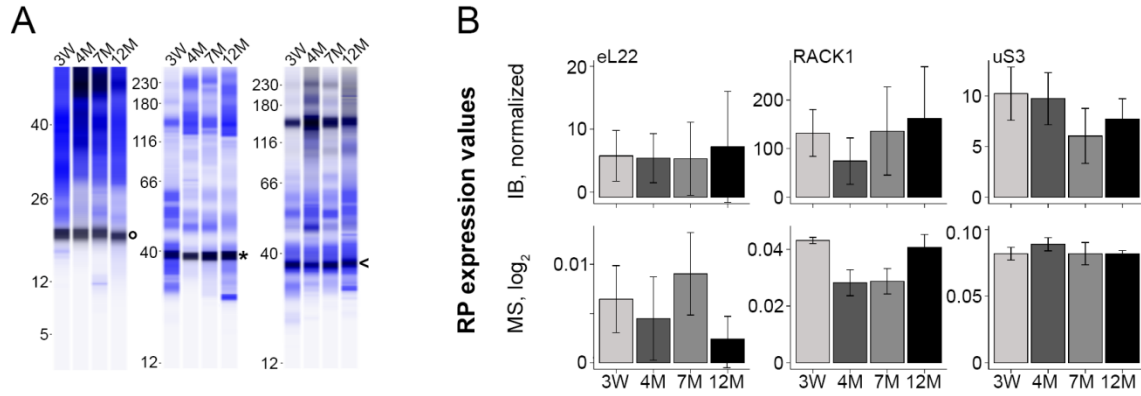

**Figure S7. Immunoblot analysis of the expression level of three liver RP proteins show no changes.** (A) Representative immunoblot of polysomal fraction from liver samples analyzed by capillary electrophoreses and probed with antibodies recognizing eL22 (o), RACK1 (\*) and uS3 (<). The immunofluorescence signal is overlaid with signal from the total protein staining. Protein weight markers in kDa are shown on the left of each blot. (B) The signal for each RP from the immunoblot (IB) is normalized to the total protein concentration of each samples using the total protein staining. Data are means  $\pm$  SEM, n=4-6 biological replicates. For comparison, the RP expression level of these three proteins from the LC/MS-MS are shown (MS).



**Table S1. Number of detected and predicted peptides for each RP.** n.d., not detected. The new nomenclature of naming ribosomal protein is considered (1).

| RP's large subunit | # of detected unique peptides in LC-MS/MS | # of <i>in silico</i> predicted unique peptide <sup>b</sup> | RP's small subunit | # of detected unique peptides in LC-MS/MS | # of <i>in silico</i> predicted unique peptides <sup>b</sup> |
|--------------------|-------------------------------------------|-------------------------------------------------------------|--------------------|-------------------------------------------|--------------------------------------------------------------|
| uL1                | 5                                         | 19                                                          | RACK1              | 16                                        | 22                                                           |
| uL2                | 7                                         | 20                                                          | eS1                | 10                                        | 26                                                           |
| uL3                | 12                                        | 34                                                          | uS2                | 16                                        | 20                                                           |
| uL4                | 18                                        | 33                                                          | uS3                | 18                                        | 21                                                           |
| uL5                | 4                                         | 15                                                          | eS4                | 13                                        | 22                                                           |
| uL6                | 4                                         | 13                                                          | uS4                | 11                                        | 22                                                           |
| eL6                | 7                                         | 26                                                          | uS5                | 10                                        | 25                                                           |
| eL8                | 15                                        | 20                                                          | eS6                | 9                                         | 22                                                           |
| uL11               | 6                                         | 12                                                          | uS7                | 6                                         | 15                                                           |
| uL13               | 9                                         | 22                                                          | eS7                | 8                                         | 16                                                           |
| eL13               | 9                                         | 20                                                          | uS8                | 7                                         | 12                                                           |
| uL14               | 6                                         | 10                                                          | eS8                | 10                                        | 15                                                           |
| eL14               | 4                                         | 18                                                          | uS9                | 7                                         | 14                                                           |
| uL15               | 4                                         | 14                                                          | uS10               | 3                                         | 8                                                            |
| eL15               | 7                                         | 19                                                          | eS10               | 6                                         | 17                                                           |
| uL16               | 2                                         | 20                                                          | uS11               | 6                                         | 8                                                            |
| uL18               | 11                                        | 28                                                          | uS12               | 1                                         | 11                                                           |
| eL18               | 6                                         | 13                                                          | eS12               | 7                                         | 10                                                           |
| eL19               | 5                                         | 17                                                          | uS13               | 11                                        | 14                                                           |
| eL20               | 6                                         | 18                                                          | uS14               | 1                                         | 8                                                            |
| eL21               | 5                                         | 16                                                          | uS15               | 6                                         | 14                                                           |
| uL22               | 8                                         | 16                                                          | uS17               | 8                                         | 14                                                           |
| eL22               | 4                                         | 10                                                          | eS17               | 9                                         | 10                                                           |
| uL23               | 6                                         | 11                                                          | uS19               | n.d.                                      | 10                                                           |
| uL24               | 7                                         | 14                                                          | eS19               | 6                                         | 16                                                           |
| eL24               | 5                                         | 12                                                          | eS21               | 3                                         | 8                                                            |
| eL27               | 7                                         | 12                                                          | eS24               | 5                                         | 11                                                           |
| eL28               | 3                                         | 16                                                          | eS25               | 4                                         | 9                                                            |
| uL29               | 5                                         | 9                                                           | eS26               | 1                                         | 9                                                            |
| eL29               | n.d.                                      | 13                                                          | eS27               | n.d.                                      | 6                                                            |
| uL30               | 12                                        | 23                                                          | eS28               | 3                                         | 5                                                            |
| eL30               | 4                                         | 10                                                          | eS30               | 2                                         | 5                                                            |
| eL31               | 2                                         | 11                                                          | eS31               | 2                                         | 15                                                           |
| eL32               | 6                                         | 12                                                          | eS27L              | 1                                         | 6                                                            |
| eL33               | 3                                         | 12                                                          |                    |                                           |                                                              |
| eL34               | n.d.                                      | 11                                                          |                    |                                           |                                                              |
| eL36               | 2                                         | 8                                                           |                    |                                           |                                                              |
| eL37               | n.d.                                      | 10                                                          |                    |                                           |                                                              |
| eL38               | 5 <sup>a</sup>                            | 4                                                           |                    |                                           |                                                              |
| eL39               | 2                                         | 3                                                           |                    |                                           |                                                              |
| eL40               | n.d.                                      | 17                                                          |                    |                                           |                                                              |
| eL41               | n.d.                                      | 0                                                           |                    |                                           |                                                              |
| eL42               | 3                                         | 10                                                          |                    |                                           |                                                              |
| eL43               | 2                                         | 6                                                           |                    |                                           |                                                              |
| uL10               | 12                                        | 24                                                          |                    |                                           |                                                              |
| P1                 | 1                                         | 5                                                           |                    |                                           |                                                              |
| P2                 | 4                                         | 6                                                           |                    |                                           |                                                              |
| eL22L              | 1                                         | 12                                                          |                    |                                           |                                                              |

<sup>a</sup>Note that in some cases the number of detected peptides can be higher than that of the *in silico* predicted peptides as peptides with modified amino acids are considered as unique peptide.

<sup>b</sup>All lengths of *in silico* predicted peptides were considered without length restriction. The shortest peptides were composed of three amino acids.

**Table S2. Peptide coverage of detected RPs. n.d., not detected.**

| RP large subunit     | Length, amino acids | Total amino acid coverage, % | Sequence and position of the detected peptides <sup>a</sup>                                                                                                                                                                                                                                                                                                                                                                                        |
|----------------------|---------------------|------------------------------|----------------------------------------------------------------------------------------------------------------------------------------------------------------------------------------------------------------------------------------------------------------------------------------------------------------------------------------------------------------------------------------------------------------------------------------------------|
| <b>Large subunit</b> |                     |                              |                                                                                                                                                                                                                                                                                                                                                                                                                                                    |
| <b>uL1</b>           | 217                 | 23.04                        | 5-VSRDTLYEAVR-15; 79-AVDIPHMDIEALKK-92; 79-AVDIPHMDIEALKK-92; 106-KYDAFLASESLIK-118; 107-YDAFLASESLIK-118; 162-VLCLAVAVGHVK-173                                                                                                                                                                                                                                                                                                                    |
| <b>uL2</b>           | 257                 | 40.86                        | 43-GIVKDIHDPGR-54; 73-TELFIAAEGIHTGQFVYCGK-92; 93-KAQLNIGNVLPVGTMPGEGTIVCCLEEKPGDR-123; 129-ASGNYATVISHNPETK-144; 164-AVVGVVAGGGR-174 164-AVVGVVAGGGRIDKPKL-181; 234-KVGLIAAR-241                                                                                                                                                                                                                                                                  |
| <b>uL3</b>           | 403                 | 30.27                        | 11-HGSLGFLPR-19; 35-DDASKPVHLTAFLGYK-50; 104-TVFAEHISDECK-115; 145-QLEKDFNSMK-154 177-KAHLMEIQVNGGTVAEK-193; 178-AHLMEIQVNGGTVAEK-193; 199-ERLEQQVPVNVQVFGQDEMIDVIGVTK-224; 201-LEQQVPVNVQVFGQDEMIDVIGVTK-224; 250-KVACIGAWHWP-261; 251-VACIGAWHWP-261; 287-IGQGYLIK-294; 301-NNASTDYDLSDK-312                                                                                                                                                     |
| <b>uL4</b>           | 419                 | 36.04                        | 1-MACARPLISVYSEK-14; 1-MACARPLISVYSEKGESESGK-20; 30-APIRPDIVNFVHTNLR-45; 30-APIRPDIVNFVHTNLRK-46; 47-NNRQPYAVSELAGHQTSAESWGTR-71; 50-QPYAVSELAGHQTSAESWGTR-71; 121-RYAICSAALAASALPALVMSK-140; 122-YAICSAALAASALPALVMSK-140; 144-IEEVEPELPLVVEDK-157; 206-GPCIINYNEEDNGIHK-219; 149-FCIWTESAFAFR-258; 249-FCIWTESAFAFRK-259; 259-KLDELYGTWR-268; 259-KLDELYGTWRK-269; 260-LDELYGTWR-268; 284-MMNTDLSR-291; 353-KLEAAATALATK-364; 354-LAAATALATK-364 |
| <b>uL5</b>           | 178                 | 17.42                        | 19-KLCLNICVGESESGDR-32; 20-LCLNICVGESESGDR-32; 30-LCLNICVGESESGDR-32; 39-VLEQLTGQTPVFSK-52                                                                                                                                                                                                                                                                                                                                                         |
| <b>uL6</b>           | 192                 | 29.69                        | 3-TILSNQTVDPENVEITLK-21; 37-DFNHINVELSLLGKK-51; 72-TICSHVQNMK-82; 130-TGVACSVSQAQK-141                                                                                                                                                                                                                                                                                                                                                             |
| <b>eL6</b>           | 296                 | 25                           | 123-YYPTEDVPR-131; 175-QLDSGLLLVTGPLVINRVPLR-195; 175-QLDSGLLLVTGPLVINRVPLRR-196; 209-VDISVKIPK-218; 219-HLTDAYFK-226; 235-HQEGEIFDTEKEK-247; 269-IAVPLQGGYLR-280                                                                                                                                                                                                                                                                                  |
| <b>eL8</b>           | 266                 | 37.22                        | 26-KVVNPLFEK-34; 27-VVNPLFEK-34; 38-NFGIGQDIQPK-48; 38-NFGIGQDIQPKR-49; 76-VPPAINQFTQALDR-89; 90-QTATQLLK-97; 138-AGVNTVTTLVENK-150; 138-AGVNTVTTLVENKK-151; 176-KMGVPYCIK-185; 177-MGVPYCIK-185; 197-KTCTTVAFTQVNSEDKGALAK-217; 198-TCTTVAFTQVNSEDK-212; 198-TCTTVAFTQVNSEDKGALAK-217; 235-RHWGGNVLGPK-245; 236-HWGGNVLGPK-245                                                                                                                    |
| <b>uL11</b>          | 165                 | 49.70                        | 32-IGPLGLSPK-40; 78-QAQIEVVPASALIHK-83; 100-HSGNITFDEIVNIAR-114; 124-ELSGTIKELGTAAQSVGCNVDR-146; 131-EILGTAAQSVGCNVDR-146; 147-HPHDIIDDINGAVECPAS-165                                                                                                                                                                                                                                                                                              |
| <b>uL13</b>          | 203                 | 34.98                        | 1-MAEGQVLVLDGR-12; 1-MAEGQVLVLDGRGHLLGR-18; 38-CEGINISGNFYR-49; 54-YLAFLRK-60; 102-LKVLGDIPIPPYDK-114; 104-VLDGIPPPYDKK-115; 117-RMVVPAALK-125; 118-MVVPAALK-125; 149-YQAVTATLEEK-159                                                                                                                                                                                                                                                              |
| <b>eL13</b>          | 211                 | 38.389                       | 6-NGMILKPHFHK-16; 22-VDTWFNQPAR-31; 22-VDTWFNQPAR-32; 75-GFSLLEELR-82; 93-TIGISVDPR-101; 106-STEQLQANVQR-116; 122-SKLLIFPR-129; 136-KGDSSAEELKATLQTPVMPIR-158; 146-LATLQTPVMPIR-158                                                                                                                                                                                                                                                                |
| <b>uL14</b>          | 140                 | 35                           | 14-FRISLGLPVGAVINCADNTGAK-35; 16-ISLGLPVGAVINCADNTGAK-35; 49-LNRLPAAGVGDMMVATVK-66; 52-LPAAGVGDMMVATVK-66; 52-LPAAGVGDMMVATVK-67; 124-ECADLWPR-131                                                                                                                                                                                                                                                                                                 |
| <b>eL14</b>          | 217                 | 21.66                        | 12-VAYISFGPHAGK-23; 24-LVAIVDVIDQNR-35; 54-CMQLTDFILK-63; 148-AAIAAAAAAAAAAK-160                                                                                                                                                                                                                                                                                                                                                                   |
| <b>uL15</b>          | 148                 | 23.65                        | 66-NQSFCTVNLTK-77; 78-LWTLVSEQTR-87; 93-NKTGVAPIIDVVR-105; 95-TGVAPIIDVVR-105                                                                                                                                                                                                                                                                                                                                                                      |
| <b>eL15</b>          | 204                 | 28.92                        | 1-MGAYKIYIQLWR-12; 6-YIQLWR-12; 57-QGYVIYR-63; 115-VLNSYVWGEDSTYK-128; 129-FFEVLIDPFHK-140 144-RNPDTQWITKPVHK-157; 145-NPDTQWITKPVHK-157                                                                                                                                                                                                                                                                                                           |
| <b>uL16</b>          | 214                 | 6.54                         | 176-FNADEFEDMVAEK-188; 176-FNADEFEDMVAEK-189                                                                                                                                                                                                                                                                                                                                                                                                       |
| <b>uL18</b>          | 297                 | 44.44                        | 55-VTNRDIICQIYAR-68; 59-DIICQIYAR-68; 69-IEGDMIVCAAYAHLEPK-85; 90-VGLTNYAAAYCTGLLLAR-107; 153-TTGNKVFGLK-164; 165-GAVDGGSLIPHSTKR-179; 179-RFPGYDSESEKFAEVHR-196; 197-KHIMGQNVADYMR-209; 198-HIMGQNVADYMR-209;                                                                                                                                                                                                                                     |

|       |      |        |                                                                                                                                                                                                                                                                                                                       |
|-------|------|--------|-----------------------------------------------------------------------------------------------------------------------------------------------------------------------------------------------------------------------------------------------------------------------------------------------------------------------|
|       |      |        | 210-YLMEEDEDAYKK-221; 229-NNVTPDMMEEMYKK-242;                                                                                                                                                                                                                                                                         |
| eL18  | 188  | 21.81  | 38-RTNSTFNQVVLK-49; 39-TNSTFNQVVLK-49; 39-TNSTFNQVVLKR-50; 79-TAVVGTVDVDR-91; 120-ILTFDQLALESPK-132; 120-ILTFDQLALESPKGR-134                                                                                                                                                                                          |
| eL19  | 196  | 18.88  | 20-KKVWLDPNETNEIANANSR-38; 21-KVWLDPNETNEIANANSR-38; 22-VWLDPNETNEIANANSR-38; 44-LIKDGLIIR-52; 154-LLADQAEAR-162                                                                                                                                                                                                      |
| eL20  | 176  | 28.98  | 42-SRFWYFVSQLKK-53; 57-SSGEIVYCGQVFEK-70; 75-VKNFGIWLK-83; 77-NFGIWLK-83; 96-EYRDLTTAGAVTQCYR-111; 99-DLTTAGAVTQCYR-111                                                                                                                                                                                               |
| eL21  | 160  | 37.5   | 21-KHGVVPLATYMR-32; 22-HGVVPLATYMR-32; 36-KGDIVDIKMGMTVQK-50; 64-VYNVQTHAVGIIVNK-78; 143-TNGKEPELEPIPIYEFMA-160                                                                                                                                                                                                       |
| uL22  | 184  | 38.59  | 4-YSLDPENPTK-13; 75-QWGWQTQGR-82; 75-QWGWQTQGRWP-85; 86-KSAEFLHMLK-96; 87-SAEFLHMLK-96; 97-NAESNAELKGLDVSLEIHIQVNK-121; 106-GLDVSLEIHIQVNK-121 154-EQIVPKPEEEVAQK-167                                                                                                                                                 |
| eL22  | 128  | 21.09  | 53-AGNLGGGVVTIER-65; 68-SKITVTSEVPFSK-80; 68-SKITVTSEVPFSKR-81; 70-ITVTSEVPFSKR-81                                                                                                                                                                                                                                    |
| uL23  | 156  | 28.21  | 69-NKLDHYAIK-78; 71-LDHYAIKFPLTTESAMK-88; 79-FPLTTESAMK-88; 89-KIEDNNTLVFIVDVK-103; 115-KLYDIDVAK-123; 116-LYDIDVAK-123                                                                                                                                                                                               |
| uL24  | 145  | 38.62  | 1-MKFNPFVTSR-11; 3-FNPFVTSR-11; 29-IMSSPLSK-36; 46-SMPIRKDDEVQVVR-59; 76-KKYVYIER-84; 78-YVYIER-84 90-ANGTTVHVGIHPSK-103                                                                                                                                                                                              |
| eL24  | 157  | 29.30  | 1-MKVELCSFSGYK-12; 3-VELCSFSGYK-12; 24-TDGKVFQFLNAK-35; 48-QINWTVLYR-56; 81-AITGASLADIMAK-93                                                                                                                                                                                                                          |
| eL27  | 136  | 47.06  | 10-VVLVLAGR-17; 28-NIDDGTSRDPYSHALVAGIDR-48; 28-NIDDGTSRDPYSHALVAGIDRYPR-51; 74-VYNYNHLMPT-84; 94-TVVNKDVRDPALK-107; 99-DVFRDPALK-107; 127-NKWWFQK-133                                                                                                                                                                |
| eL28  | 137  | 21.90  | 1-MSAHLQWVVV-11; 12-NCSFLIK-19; 23-QTYSTEPNNLK-33                                                                                                                                                                                                                                                                     |
| uL29  | 123  | 30.08  | 20-QLDDLKVELSQLR-32; 57-VLTVINQTK-66; 57-VLTVINQTKENLR-70; 77-KYKPLDLRPK-86; 78-YKPLDLRPK-86                                                                                                                                                                                                                          |
| eL29  | n.d. |        |                                                                                                                                                                                                                                                                                                                       |
| uL30  | 270  | 30     | 10-KVATVPGTLK-19; 31-KKVPVAVPETLK-41; 32-KVAVPETLK-41; 99-KAGNFYVPAEPK-110; 100-AGNFYVPAEPK-110; 129-KVLQLLR-135; 138-QIFNGTFVK-146; 171-SVNELIYK-178; 188-RIALTDNSLIAR-199; 189-IALTDNSLIAR-199; 223-FKEANNFLWPFK-234; 225-EANNFLWPFK-234                                                                            |
| eL30  | 115  | 51.30  | 45-LVILANNCPLR-56; 57-KSEIEYYAMLAK-68; 69-TGVHHYSGNINELGTACGK-87; 91-VCTLAIIDPGDSDIIR-106                                                                                                                                                                                                                             |
| eL31  | 125  | 18.4   | 93-NEDEDSPNKLYTLVTVYVPVTTFK-115; 102-LYTLVTVYVPVTTFK-115                                                                                                                                                                                                                                                              |
| eL32  | 135  | 25.93  | 49-FKGQILMPNIGYGSNK-64; 49-FKGQILMPNIGYGSNKK-65; 51-GQILMPNIGYGSNK-64; 51-GQILMPNIGYGSNKK-65 68-HMLPSGFR-75; 84-ELEVLLMCNK-93                                                                                                                                                                                         |
| eL33  | 110  | 22.73  | 30-IEGVYARDETEFYLGKR-46; 37-DETEFYLGKR-46; 103-VMLYPSRI-110                                                                                                                                                                                                                                                           |
| eL34  | n.d. |        |                                                                                                                                                                                                                                                                                                                       |
| eL36  | 105  | 21.91  | 1-MALRYPMAVGLNK-13; 46-EVCGFAPYER-55                                                                                                                                                                                                                                                                                  |
| eL37  | n.d. |        |                                                                                                                                                                                                                                                                                                                       |
| eL38  | 70   | 52.857 | 4-KIEEIKDFLLTAR-16; 5-IEEIKDFLLTAR-16; 41-YLYTLVITDKEK-52; 56-LKQLPPLAVK-67; 58-QLPPLAVK-67                                                                                                                                                                                                                           |
| eL39  | 51   | 23.529 | 17-QKQNRPIQWIR-28; 19-QNRPIQWIR-28                                                                                                                                                                                                                                                                                    |
| eL40  | n.d. |        |                                                                                                                                                                                                                                                                                                                       |
| eL41  | n.d. |        |                                                                                                                                                                                                                                                                                                                       |
| eL42  | 106  | 25.48  | 45-QSGYGGQTKPIFR-57; 65-KIVLRLECEPNCR-78; 70-LECEPNCR-78                                                                                                                                                                                                                                                              |
| eL43  | 92   | 32.61  | 51-AVGIIWHCGSCMK-62; 63-TVAGGAWTYNTTSAVTVK-80                                                                                                                                                                                                                                                                         |
| uL10  | 317  | 46.06  | 17-IIQLDDYPK-26; 27-CFIVGADNVGSK-38; 84-GNVGFVFTK-92; 93-EDLTEIRDMLLANK-106; 93-EDLTEIRDMLLANKVPAAR-112; 100-DMLLANKVPAAR-112; 113-AGAIAPCEVTPAQNTGLGPEK-134; 113-AGAIAPCEVTPAQNTGLGPEKTSFFQALGITTK-146; 135-TSFFQALGITTK-146; 150-GTIEILSDVQLIK-162; 248-VLALSVETEYTFPLTEK-264; 267-AFLADPSAFAAAAAATAAAPAAAAAPAK-297 |
| P1    | 114  | 14.04  | 34-AAGVSVFPWGLFAK-49                                                                                                                                                                                                                                                                                                  |
| P2    | 115  | 41.74  | 3-YVASYLLAALGGNSSPSAK-21; 25-KILDSVIEADDDRLNK-4; 26-ILDSVIEADDDRLNK-41; 50-NIEDVIAQGVGK-61                                                                                                                                                                                                                            |
| eL22L | 122  | 9.84   | 48-TGNLGNVHIER-59                                                                                                                                                                                                                                                                                                     |

| <b>Small subunit</b> |     |       |                                                                                                                                                                                                                                                                                                                                                                                                                     |
|----------------------|-----|-------|---------------------------------------------------------------------------------------------------------------------------------------------------------------------------------------------------------------------------------------------------------------------------------------------------------------------------------------------------------------------------------------------------------------------|
| <b>RACK1</b>         | 317 | 68.14 | 13-GHNGWVQTIAATPQFPDMILSASR-36; 37-DKTIIMWK-44; 89-LWDLTTGTTTR-99; 89-LWDLTTGTTTR-100; 107-DVLSVAFSSDNR-118; 131-LWNTLGVCK-139 140-YTVQDESHSEWVSCVR-155; 156-FSPNSSNPIIVSCGWDK-172; 184-LKTNHIGHTGYLNTVTVSPDGLSCASGGK-212; 186-TNHIGHTGYLNTVTVSPDGLSCASGGK-212; 213-DGQAMLWDLNEGK-225; 226-HLYTLDGGDIINALCFSPNR-245; 246-YWLCAATGPSIK-257; 258-IWDLEGK-264; 281-AEPPQCTSLAWSADGQTLFAGYTDNLVR-208; 309-VVQVTIGTR-317 |
| <b>eS1</b>           | 264 | 40.53 | 35-APAMFNIR-42; 66-VFEVSLADLQNDVAFR-82; 66-VFEVSLADLQNDVAFR-83; 84-FKLITEDVQVK-94; 95-NCLTNFHMMDLTR-107; 137-LFCVGFVK-144; 168-MMEIMTR-174; 175-EVQTNLDLKEVVK-187; 200-ACQSIYPLHDFVR-213 250-VERADGYEPPVQESV-264                                                                                                                                                                                                    |
| <b>uS2</b>           | 295 | 65.42 | 1-MSGALDVLQMK-11; 1-MSGALDVLQMKKEEDVLK-17; 18-FLAAGTHLGGTNLDFQMEQYIYK-40; 42-KSDGIYIINLK-52; 42-KSDGIYIINLK-53; 43-SDGIYIINLK-52; 64-AIVAIENPADVSVISSR-80; 86-AVLKFAAATGATPIAGR-102; 90-FAAATGATPIAGR-102; 103-FTPGTFTNQIAAFAFR-117; 103-FTPGTFTNQIAAFREPR-120; 121-LLVVDPR-128; 129-ADHQPLTEASYVNLPTIALCNTDSPLR-155; 156-YVDIAIPCNNK-166; 167-GAHSVGLMWWMLAR-180; 192-EHPWEVMPDLYFYRDPEEIEKEEQAAAEK-220            |
| <b>uS3</b>           | 243 | 73.66 | 10-KFVADGIFK-18; 11-FVADGIFK-18; 19-AELNEFLTR-27; 28-ELAEDGYSGVEVR-40; 46-TEIILATR-54; 66-IRELTAVVQK-75; 66-IRELTAVVQKR-76; 77-FGFPEGSVELYAEK-90; 95-GLCAIAQESLR-106; 107-YKLLGGLAVR-116; 133-GCEVVVSGK-141; 152-FVDGLMIHSGDPVNYVDTAVR-173; 179-QGVLGIVK-187; 186-VKIMLPWDPSGK-197; 188-IMLPWDPSGK-197; 202-KPLPDHVSIVEPKDEILPTPISEQK-227; 215-DEILPTPISEQK-227; 228-GGKPEPPAMPQPVPPTA-243                          |
| <b>eS4</b>           | 263 | 47.91 | 38-LRECLPLIIFLR-49; 52-LKYALTGDEVKK-63; 76-VRTDITYPAGFMDVISIDK-94; 76-VRTDITYPAGFMDVISIDKTGENFR-100; 78-TDITYPAGFMDVISIDK-94; 146-TIRYDPLIK-155; 149-YPDPLIK-155; 156-VNDTIQIDLETGK-168; 169-ITDFIKFDTGNLCMVTGGANLGR-191; 175-FDTGNLCMVTGGANLGR-191; 201-HPGSFVHVVK-211; 201-HPGSFVHVVKDANGNSFATR-221; 231-GNKPWISLPR-240                                                                                           |
| <b>uS4</b>           | 194 | 37.63 | 23-SRLDQELKLGEGYGLR-38; 31-LIGEGYGLR-38; 59-ELLTLDEKDR-69; 59-ELLTLDEKDR-70; 70-RLFEGNALLR-79; 71-LFEGNALLR-79; 92-MKLDYILGLK-101; 102-IEDFLER-108; 139-KQVWNIPSFIVR-150; 140-QVWNIPSFIVR-150; 156-HIDFSLR-162                                                                                                                                                                                                      |
| <b>uS5</b>           | 293 | 35.15 | 55-AEDKEWIPVTK-65; 126-AFVAIGDYNGHVGLGVK-142; 160-LSIVPVR-167 201-GTGIVSAPVPK-211; 212-KLLMMAGIDDCYTSAR-227; 213-LLMMAGIDDCYTSAR-227; 228-GCTATLGNFAK-238 247-TYSYLTPLDVK-257; 247-TYSYLTPLDVKETVFTK-263 264-SPYQEFTDHLVK-275                                                                                                                                                                                       |
| <b>eS6</b>           | 249 | 25.30 | 1-MKLNISFPATGCQK-14; 3-LNISFPATGCQK-14 31-RMATEVAADALGEEWKGYVVR-51; 32-MATEVAADALGEEWK-46; 32-MATEVAADALGEEWKGYVVR-51; 116-KGEKDIPGLTDTTVPR-131; 117-GEKDIPGLTDTTVPR-131; 143-KLFNLSKEDDVR-154; 144-LFNLSKEDDVR-154                                                                                                                                                                                                 |
| <b>uS7</b>           | 204 | 31.86 | 1-MTEWEAATPAVAETPDIK-18; 1-MTEWEAATPAVAETPDIKLFGK-22; 23-WSTDDVQINDISLQDYIAVK-42; 137-QAVDVSPLR-145; 146-RVNQAIWLLCTGAR-159; 147-VNQAIWLLCTGAR-159                                                                                                                                                                                                                                                                  |
| <b>eS7</b>           | 194 | 51.55 | 8-IVKPNGEKPDFEFGISQALLELEMNSDLK-37; 58-KAIIIFVVPQLK-70; 59-AIIIFVVPQLK-70; 121-TLTAHVDAILEDLVFPSEIVGKR-143; 161-AQQNNVEHKVETFSGVYK-178; 161-AQQNNVEHKVETFSGVYK-179; 170-VETFSGVYK-179; 180-LTGKDVNFEPFQL-194                                                                                                                                                                                                        |
| <b>uS8</b>           | 130 | 46.15 | 4-MNVLADALK-12; 37-FLTVMK-43; 44-HGYIGEFIEIDHR-57; 61-IVVNLTR-68; 61-IVVNLTR-71; 79-FDVQLKDLKQWQNNLLPSR-97; 89-WQNNLLPSR-97                                                                                                                                                                                                                                                                                         |
| <b>eS8</b>           | 208 | 54.81 | 57-ALRLDVGNFWSWGSECCTR-74; 60-LDVGNFWSWGSECCTR-74; 78-IIDVVYNASNELVR-92; 99-NCIVLIDSTPYR-110; 111-QWYESHYALPLGR-123; 129-LTPEEEEEILNKKR-141; 158-ISSLLLEEQFQGGK-170; 171-LLACIASRPGQCGR-184; 185-ADGYVLEGELEFYLR-200; 194-ELEFYLR-200                                                                                                                                                                               |
| <b>uS9</b>           | 146 | 39.73 | 1-MPSKGPLQSVQVFR-15; 5-GPLQSVQVFR-15; 34-VNGRPLEMIEPR-45; 74-GGGHVAQIYAIR-85; 107-EIKDILIQYDR-117; 110-DILIQYDR-117; 118-TLLVADPR-125                                                                                                                                                                                                                                                                               |
| <b>uS10</b>          | 119 | 26.05 | 1-MAFKDTGKTPVEPEVAIHR-19; 9-TPVEPEVAIHR-19; 88-LIDLHSPSEIVK-99                                                                                                                                                                                                                                                                                                                                                      |
| <b>eS10</b>          | 165 | 39.39 | 32-HPELADKNVNLHVVK-47; 56-GYVKEQFAWR-65; 81-DYLHLPPEIVPATLR-95; 130-SAVPPGADKKAEGAGSATEFQFR-153; 139-KAEAGAGSATEFQFR-153; 140-AEAGAGSATEFQFR-153                                                                                                                                                                                                                                                                    |

|              |      |        |                                                                                                                                                                                                                                             |
|--------------|------|--------|---------------------------------------------------------------------------------------------------------------------------------------------------------------------------------------------------------------------------------------------|
| <b>uS11</b>  | 151  | 33.113 | 62-VKADREDESSPYAAMLAAQDVAQR-84;<br>64-ADREDESSPYAAMLAAQDVAQR-84; 87-ELGITALHIK-96;<br>126-IGRIEDVTPIPSDSTR-141; 129-IEDVTPIPSDSTR-141;<br>129-IEDVTPIPSDSTR-142                                                                             |
| <b>uS12</b>  | 143  | 7.69   | 125-VANVSLALYK-135                                                                                                                                                                                                                          |
| <b>eS12</b>  | 132  | 59.09  | 1-MAEEGIAAGVMDVNTALQEVLK-23; 46-QAHLCLASNCDEPMYVK-63;<br>85-LGEWVGLCK-93; 102-KVVGCSVVVK-112;<br>102-KVVGCSVVVKDYGK-116; 117-ESQAKDVIEEYFK-129;<br>122-DVIEEYFK-129                                                                         |
| <b>uS13</b>  | 152  | 49.34  | 1-MSLVIPEK-8; 1-MSLVIPEKFQHILR-14; 25-KIAFAITAIK-34;<br>26-IAFAITAIK-34; 55-RAGELTEDEVER-66; 56-AGELTEDEVER-66;<br>56-AGELTEDEVERVITIMQNPR-75; 67-VITIMQNPR-75; 76-QYKIPDWFLNR-86<br>95-YSQVLANGLDNK-106; 95-YSQVLANGLDNKREDLER-113         |
| <b>uS14</b>  | 56   | 21.43  | 1-MGHQQLYWSHPR-12                                                                                                                                                                                                                           |
| <b>uS15</b>  | 151  | 37.75  | 10-GLSQSALPYR-19; 28-LTSDDVKEQIYK-39; 43-KGLTPSQIGVILR-55;<br>44-GLTPSQIGVILR-55; 79-GLAPDLPEDLYHLIK-93; 115-LILIESR-121                                                                                                                    |
| <b>uS17</b>  | 158  | 46.20  | 13-QPTIFQNK-20; 49-EAIEGTYIDKK-59; 59-KCPFTGNVSIR-69;<br>60-CPFTGNVSIR-69; 72-ILSGVVTK-79; 91-DYLHYIR-97;<br>108-NMSVHLSPCFR-118; 119-DVQIGDITVGECPRLSK-136                                                                                 |
| <b>eS17</b>  | 135  | 53.33  | 33-RVCEEIAIPSK-44; 33-RVCEEIAIPSKK-45; 34-VCEEIAIPSK-44;<br>34-VCEEIAIPSKK-45; 50-IAGYVTHLMK-59;<br>81-RDNYVPEVSALDQEIEVDPDTK-103;<br>81-RDNYVPEVSALDQEIEVDPDTKEMLK-107;<br>82-DNYVPEVSALDQEIEVDPDTK-103;<br>108-LLDFGSLSNLQVTQPTVGMNFK-129 |
| <b>uS19</b>  | n.d. |        |                                                                                                                                                                                                                                             |
| <b>eS19</b>  | 145  | 45.52  | 1-MPGVTVKDVENQEFVIR-16; 8-DVNQEFVIR-16; 28-LKVPPEWVDTVK-38;<br>42-HKELAPYDENWFYTR-56; 102-RVLQALEGLK-111;<br>130-DLDRIAGQVAAANK-143                                                                                                         |
| <b>eS21</b>  | 83   | 40.96  | 1-MQNDAGEFVDLYVPRK-16; 28-DHASIQMNVAEVD-41<br>28-DHASIQMNVAEVDRTTGR-45                                                                                                                                                                      |
| <b>eS24</b>  | 133  | 27.07  | 1-MNDVTIR-8; 21-QMVIDVLHPGK-32; 22-QMVIDVLHPGK-32;<br>69-TTGFGMIYDSLDAK-83; 69-TTGFGMIYDSLDAK-84                                                                                                                                            |
| <b>eS25</b>  | 125  | 20.8   | 42-DKLNVLVDFK-52; 42-DKLNVLVDFKATYDK-57; 44-LNVLVDFK-52;<br>67-LITPAVVSER-76                                                                                                                                                                |
| <b>eS26</b>  | 115  | 10.44  | 71-LHYCVSCAIHSK-82                                                                                                                                                                                                                          |
| <b>eS27</b>  | n.d. |        |                                                                                                                                                                                                                                             |
| <b>eS28</b>  | 69   | 27.54  | 48-GPVREGDVLTLLESER-63; 52-EGDVLTLLESER-63;<br>52-EGDVLTLLESEREAR-66                                                                                                                                                                        |
| <b>eS30</b>  | 59   | 20.34  | 41-RFVNVVPTFGK-51; 42-FVNVVPTFGK-52                                                                                                                                                                                                         |
| <b>eS31</b>  | 156  | 12.178 | 120-ECPSDECGAGVFMGSHFDR-138                                                                                                                                                                                                                 |
| <b>eS27L</b> | 84   | 14.29  | 6-DLLHPSLEEEKK-17                                                                                                                                                                                                                           |

<sup>a</sup>Numbers denote the position of the first and last amino acid of the peptide in the RP sequence.

**Table S3. Correlation between RP levels in both biological replicates and between different tissues and ages.** R<sup>2</sup>, Pearson correlation coefficient for expression in tissues (upper panel, data summarized in Fig. 1B) and ages (lower panel, data summarized in Fig. 1C). Cer, cerebellum; HC, hippocampus; Cor, cortex, Liv, liver; P, polysomes; W, week; M, month.

| Compared to Liv 80S         | Cer 80S | Cor 80S | HC 80S | Compared to Liv P           | Cer P | Cor P | HC P |
|-----------------------------|---------|---------|--------|-----------------------------|-------|-------|------|
| 3 weeks<br>R <sup>2</sup>   | 0.98    | 0.97    | 0.96   | 3 weeks<br>R <sup>2</sup>   | 0.94  | 0.95  | 0.97 |
| 4 months<br>R <sup>2</sup>  | 0.93    | 0.95    | 0.91   | 4 months<br>R <sup>2</sup>  | 0.95  | 0.97  | 0.91 |
| 7 months<br>R <sup>2</sup>  | 0.94    | 0.93    | 0.89   | 7 months<br>R <sup>2</sup>  | 0.95  | 0.94  | 0.92 |
| 12 months<br>R <sup>2</sup> | 0.97    | 0.94    | 0.96   | 12 months<br>R <sup>2</sup> | 0.95  | 0.92  | 0.94 |

| Comparisons                  | Cer 80S | Cer P | Cor 80S | Cor P | HC 80S | HC P | Liv 80S | Liv P |
|------------------------------|---------|-------|---------|-------|--------|------|---------|-------|
| 3W vs. 4M<br>R <sup>2</sup>  | 0.91    | 0.96  | 0.94    | 0.95  | 0.89   | 0.90 | 0.95    | 0.89  |
| 3W vs. 7M<br>R <sup>2</sup>  | 0.89    | 0.94  | 0.90    | 0.93  | 0.88   | 0.89 | 0.89    | 0.86  |
| 3W vs. 12M<br>R <sup>2</sup> | 0.97    | 0.95  | 0.94    | 0.95  | 0.94   | 0.97 | 0.98    | 0.97  |

**Table S4. Correlation between the RP expression levels in different samples.** Pearson correlation coefficient ( $R^2$ ) for the 80S and polysomal fractions (upper panel, data summarized in Fig. S2) and the whole RPs set (global) or for RPs within expression values in the lower 1/3<sup>rd</sup> between biological replicates (lower panel, data summarized in Fig. S4). P values for each two biological replicates from Wilcoxon rank sum test (middle panel, data summarized in Fig. S3). Cer, cerebellum; HC, hippocampus; Cor, cortex; Liv, liver; P, polysomes; W, week; M, month.

| Ages      | Cer 80S vs P | Cor 80S vs P | HC 80S vs P | Liv 80S vs P |
|-----------|--------------|--------------|-------------|--------------|
| 3 weeks   | 0.96         | 0.99         | 0.97        | 0.97         |
| 4 months  | 0.95         | 0.96         | 0.97        | 0.97         |
| 7 months  | 0.96         | 0.93         | 0.93        | 0.97         |
| 12 months | 0.97         | 0.93         | 0.97        | 0.95         |

| Samples   | Cer 80S | Cer P | Cor 80S | Cor P | HC 80S | HC P | Liv 80S | Liv P |
|-----------|---------|-------|---------|-------|--------|------|---------|-------|
| 3 weeks   | 0.90    | 0.97  | 0.93    | 0.85  | 0.92   | 0.92 | 0.95    | 0.94  |
| 4 months  | 0.79    | 0.98  | 0.77    | 0.75  | 0.89   | 0.66 | 0.57    | 0.85  |
| 7 months  | 0.79    | 0.86  | 0.99    | 0.80  | 0.78   | 0.65 | 0.85    | 0.89  |
| 12 months | 0.73    | 0.89  | 0.98    | 0.77  | 0.67   | 0.62 | 0.72    | 0.64  |

|                                        | Cer 80S | Cer P | Cor 80S | Cor P | HC 80S | HC P | Liv 80S | Liv P |
|----------------------------------------|---------|-------|---------|-------|--------|------|---------|-------|
| 3W                                     |         |       |         |       |        |      |         |       |
| R <sup>2</sup> global                  | 0.98    | 0.97  | 0.94    | 0.94  | 0.94   | 0.96 | 0.96    | 0.95  |
| R <sup>2</sup> lower 1/3 <sup>rd</sup> | 0.92    | 0.94  | 0.75    | 0.84  | 0.69   | 0.82 | 0.77    | 0.83  |
| 4M                                     |         |       |         |       |        |      |         |       |
| R <sup>2</sup> global                  | 0.93    | 0.92  | 0.94    | 0.95  | 0.94   | 0.90 | 0.90    | 0.90  |
| R <sup>2</sup> lower 1/3 <sup>rd</sup> | 0.88    | 0.66  | 0.84    | 0.87  | 0.79   | 0.62 | 0.60    | 0.70  |
| 7M                                     |         |       |         |       |        |      |         |       |
| R <sup>2</sup> global                  | 0.91    | 0.93  | 0.91    | 0.87  | 0.84   | 0.88 | 0.98    | 0.94  |
| R <sup>2</sup> lower 1/3 <sup>rd</sup> | 0.81    | 0.80  | 0.69    | 0.71  | 0.77   | 0.85 | 0.93    | 0.73  |
| 12M                                    |         |       |         |       |        |      |         |       |
| R <sup>2</sup> global                  | 0.96    | 0.97  | 0.90    | 0.96  | 0.86   | 0.95 | 0.95    | 0.95  |
| R <sup>2</sup> lower 1/3 <sup>rd</sup> | 0.85    | 0.93  | 0.83    | 0.87  | 0.67   | 0.83 | 0.88    | 0.87  |

**Table S5. Correlation between the RP levels in seven and twelve-month samples compared to four month sample.**  $R^2$ , Pearson correlation coefficient (data are summarized in Fig. 3). Cer, cerebellum; HC, hippocampus; Cor, cortex; Liv, liver; P, polysomes; W, week; M, month.

|           | Cer 80S | Cer P | Cor 80S | Cor P | HC 80S | HC P | Liv 80S | Liv P |
|-----------|---------|-------|---------|-------|--------|------|---------|-------|
| 4M vs 7M  | 0.96    | 0.97  | 0.96    | 0.97  | 0.97   | 0.98 | 0.97    | 0.95  |
| 4M vs 12M | 0.90    | 0.91  | 0.90    | 0.90  | 0.81   | 0.84 | 0.93    | 0.91  |

## References

1. Ban N, *et al.* A new system for naming ribosomal proteins. *Cur Opin Struct Biol* 24:165-169 (2014).
